# Supplementary material
Source: MDPI journal article supplement (https://www.mdpi.com/2410-3888/7/4/192)
Supplement: s1 [file s1]

## Supplementary material

In order to better understand the meaning of the different principal components in this study, it is necessary to analyze the partial contribution of variables.

Firstly, the three principal components of the choice of the Chinese fisherfolk's income were investigated (Table S1). All four types of fisherfolk's income make a significant contribution to Prin1 in 2010 and 2020, demonstrating that HOI (Household operating income), SI (Salary income), PI (Property net income), and TI (Transfer income) are all plausible contributors to Chinese fisherfolk's income, this is credible. The largest contributor to Prin2 in 2010 was SI (Salary income), indicating that it is plausible that salary income was an essential component of Chinese fisherfolk's income in 2010. In 2020 Prin2, the highest contribution is made by the HOI (Household operating income), which proves that what we mentioned before about income from operating fisheries is still the primary source of income for Chinese fisherfolk's households and that it is plausible that Chinese fisherfolk are still relying on traditional production methods for their income. The largest contributor to Prin3 in 2010 was TI (Transfer income), with most of the transfer income coming from various recurrent transfers from the government, institutions, and social teams to fisherfolk. The highest contributor in Prin3 in 2020 is PI (Property net income). Property net income includes net interest income, dividend income, net savings insurance income, and net rental income from the transfer of contracted land or water rights, and these are important for Chinese fisherfolk's income.

Secondly, the first four principal components in 2010 and the first three principal components in 2020 of the choice of the environmental factors affecting Chinese aquaculture production were investigated (Table S2). The study found that the highest contributor in Prin1 in 2010 was TFA (typhoons and floods) and in Prin1 in 2020 was DA (disease), an infectious or parasitic disease caused by fungi, bacteria and viruses that kills fish products and is one of the environmental factors affecting fisheries and aquaculture. In addition, the highest contributor in Prin2 in 2010 was OA (Other), and in Prin2 in 2020, TFA (Typhoons and floods) and PA (Pollution) were the highest contributors, with typhoons, floods and pollution also being important factors affecting fisheries and aquaculture. The highest contributor in Prin3 in 2010 and 2020 is DRA (drought), which triggers evaporation of pond water, leading to increased aquaculture intensity and deterioration of water quality, which has a serious impact on fisheries and aquaculture production, in line with the reality of the situation at hand. This study also included Prin4 in the 2010 study, and the highest contributor in Prin4 in 2010 was PA (pollution).

**Table S1.** Eigenvalues and partial contribution of variables of Chinese fisherfolk's income in 2010 and 2020.

|                                             | 2010     |          |          |         | 2020     |          |          |          |
|---------------------------------------------|----------|----------|----------|---------|----------|----------|----------|----------|
|                                             | Prin1    | Prin2    | Prin3    | Prin4   | Prin1    | Prin2    | Prin3    | Prin4    |
| Eigenvalues of Chinese fisherfolk's income. |          |          |          |         |          |          |          |          |
| Eigenvalue                                  | 3.2496   | 0.3988   | 0.2574   | 0.0941  | 2.3958   | 0.7827   | 0.4512   | 0.3703   |
| Percent                                     | 81.24    | 9.971    | 6.436    | 2.353   | 59.895   | 19.566   | 11.28    | 9.258    |
| Cum Percent                                 | 81.24    | 91.211   | 97.647   | 100     | 59.895   | 79.462   | 90.742   | 100      |
| Partial contribution of variables.          |          |          |          |         |          |          |          |          |
| HOI                                         | 89.64549 | 0.01398  | 5.56218  | 4.77834 | 50.24627 | 34.47098 | 12.98273 | 2.30001  |
| SI                                          | 71.42968 | 24.49156 | 3.96447  | 0.11429 | 61.98912 | 19.78066 | 0.77716  | 17.45306 |
| PI                                          | 88.59896 | 1.18797  | 5.75013  | 4.46293 | 63.55749 | 9.18208  | 24.52586 | 2.73457  |
| TI                                          | 75.28478 | 14.19147 | 10.46819 | 0.05557 | 63.78839 | 14.83156 | 6.83581  | 14.54424 |

Source: Authors' own calculations based on data from *China Fisheries Statistical Yearbook 2011* and *China Fisheries Statistical Yearbook 2021*.

**Table S2.** Eigenvalues and partial contribution of variables of aquaculture environmental conditions in different Chinese regions in 2010 and 2020.

|  | 2010 | 2020 |
|--|------|------|
|--|------|------|

| Eigenvalues of aquaculture environmental conditions in different Chinese regions. |          |          |          |          |         |          |          |          |          |          |
|-----------------------------------------------------------------------------------|----------|----------|----------|----------|---------|----------|----------|----------|----------|----------|
|                                                                                   | Prin1    | Prin2    | Prin3    | Prin4    | Prin5   | Prin1    | Prin2    | Prin3    | Prin4    | Prin5    |
| Eigenvalue                                                                        | 2.5202   | 1.0559   | 0.9842   | 0.3039   | 0.1359  | 2.8559   | 0.7572   | 0.7161   | 0.4157   | 0.2551   |
| Percent                                                                           | 50.403   | 21.117   | 19.684   | 6.079    | 2.717   | 57.118   | 15.145   | 14.322   | 8.314    | 5.101    |
| Cum Percent                                                                       | 50.403   | 71.52    | 91.204   | 97.283   | 100     | 57.118   | 72.263   | 86.585   | 94.899   | 100      |
| Partial contribution of variables.                                                |          |          |          |          |         |          |          |          |          |          |
| TFA                                                                               | 79.69745 | 7.94573  | 4.74396  | 0.00195  | 7.61091 | 51.92785 | 31.9667  | 0.00094  | 15.53571 | 0.5688   |
| DA                                                                                | 73.63843 | 12.70611 | 2.15493  | 6.90254  | 4.59798 | 76.96425 | 0.01985  | 0.28455  | 10.88693 | 11.84442 |
| DRA                                                                               | 1.09615  | 21.74012 | 76.95953 | 0.17749  | 0.02671 | 59.6003  | 0.06276  | 30.19133 | 1.90869  | 8.23693  |
| PA                                                                                | 73.87821 | 8.12841  | 0.2679   | 16.64617 | 1.07931 | 45.48449 | 43.49458 | 0.03512  | 10.88064 | 0.10516  |
| OA                                                                                | 23.70506 | 55.06549 | 14.29436 | 6.66493  | 0.27016 | 51.6146  | 0.1788   | 41.09659 | 2.36015  | 4.74986  |

Source: Authors' own calculations based on data from *China Fisheries Statistical Yearbook 2011* and *China Fisheries Statistical Yearbook 2021*.

According to the eigenvector matrix of the principal component analysis of Chinese fisherfolk's income, HOI (household business income), SI (wage income), PI (net property income) and TI (transfer income) are set as  $Y_1, Y_2, Y_3$  and  $Y_4$ , and the principal component models of Chinese fisherfolk's income in 2010 and 2020 can be obtained as follow:

$$\begin{cases} V1_{2010} = 0.525Y_1 + 0.469Y_2 + 0.522Y_3 + 0.481Y_4 & (S1) \\ V2_{2010} = 0.019Y_1 + 0.784Y_2 - 0.173Y_3 - 0.597Y_4 & (S2) \\ V3_{2010} = -0.46481Y_1 + 0.392Y_2 - 0.473Y_3 + 0.638Y_4 & (S3) \end{cases}$$

Similarly, research can lead to the 2020 principal component model of Chinese fisherfolk's income:

$$\begin{cases} V1_{2020} = 0.458Y_1 + 0.509Y_2 + 0.515Y_3 + 0.516Y_4 & (S4) \\ V2_{2020} = 0.664Y_1 - 0.503Y_2 + 0.343Y_3 - 0.435Y_4 & (S5) \\ V3_{2020} = 0.536Y_1 - 0.131Y_2 - 0.737Y_3 + 0.389Y_4 & (S6) \end{cases}$$

It is also based on the matrix of eigenvectors from the principal component analysis of the environmental factors affecting Chinese aquaculture production, by setting TFA(Typhoons and floods), DA(Diseases), DRA(Droughts), PA(Pollution), and OA(Others) as  $K_1, K_2, K_3, K_4, K_5$ , the 2010 principal component model of environmental factors affecting Chinese aquaculture production can be obtained:

$$\begin{cases} U1_{2010} = 0.562K_1 + 0.541K_2 + 0.066K_3 + 0.541K_4 + 0.307K_5 & (S7) \\ U2_{2010} = 0.274K_1 + 0.347K_2 + 0.454K_3 - 0.277K_4 - 0.722K_5 & (S8) \\ U3_{2010} = -0.220K_1 - 0.148K_2 + 0.884K_3 + 0.052K_4 + 0.381K_5 & (S9) \\ U4_{2010} = 0.008K_1 + 0.477K_2 - 0.076K_3 - 0.740K_4 + 0.468K_5 & (S10) \end{cases}$$

Similarly, research can lead to the 2020 principal component model of environmental factors affecting Chinese aquaculture production:

$$\begin{cases} U1_{2020} = 0.426K_1 + 0.519K_2 + 0.457K_3 + 0.399K_4 + 0.425K_5 & (S11) \\ U2_{2020} = -0.650K_1 + 0.016K_2 - 0.0288K_3 + 0.758K_4 - 0.049K_5 & (S12) \\ U3_{2020} = -0.003K_1 - 0.063K_2 - 0.649K_3 + 0.022K_4 + 0.758K_5 & (S13) \end{cases}$$
